# Supplementary material
Source: PubMed Central journal article supplement (PMC4496598)
Supplement: IAI.00517-15_zii999091317so1.pdf [file IAI.00517-15_zii999091317so1.pdf]

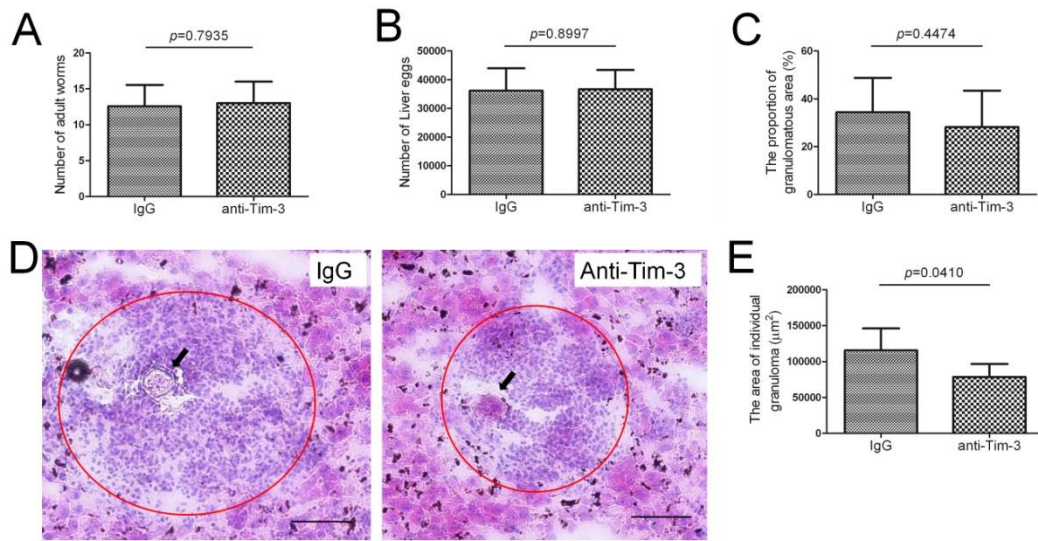

**Fig.S1. Anti-Tim-3 treatment slightly alleviated the formation of individual granulomas.**

*S. japonicum*-infected mice (10 mice per group) received an intraperitoneal injection of anti-Tim-3 antibody or rat IgG (100 $\mu\text{g}$  per mouse) the day of infection. Mice were then treated with antibodies once a week and euthanized at 6 weeks post-infection. **A**, the number of adult worms was compared between the two groups. **B**, the number of liver eggs was compared between the two groups. **C**, **D** and **E**, granulomas formation in the livers was detected by HE staining. **C**, the proportion of granulomatous areas was compared between the two groups. **D**, representative HE staining of individual granulomas with only one egg, the red circles indicated the areas of the granulomas and the black arrows indicated the single egg in the individual granulomas. **E**, the areas of individual granulomas was compared between the two groups, and 10 individual granulomas from each mouse were considered in the comparison (Mean  $\pm$  SD).
